# Supplementary material for: Expanding molecular logic capabilities in DNA-scaffolded multiFRET triads
Source: Royal Society of Chemistry journal article supplement (doi:10.1039/c6ra23079b), 2016-01-01
Supplement: c6ra23079b1.pdf [file c6ra23079b1.pdf]

## Supporting Information

### Expanding Molecular Logic Capabilities in DNA-Scaffolded MultiFRET Triads

Susan Buckhout-White<sup>a</sup>, Carl W. Brown III<sup>a,c</sup>, David A. Hastman Jr.<sup>a</sup>, Mario G. Ancona<sup>b</sup>,  
Joseph S. Melinger<sup>b</sup>, Ellen R. Goldman<sup>a</sup>, and Igor L. Medintz<sup>a\*</sup>

**Phosphoramidites:**

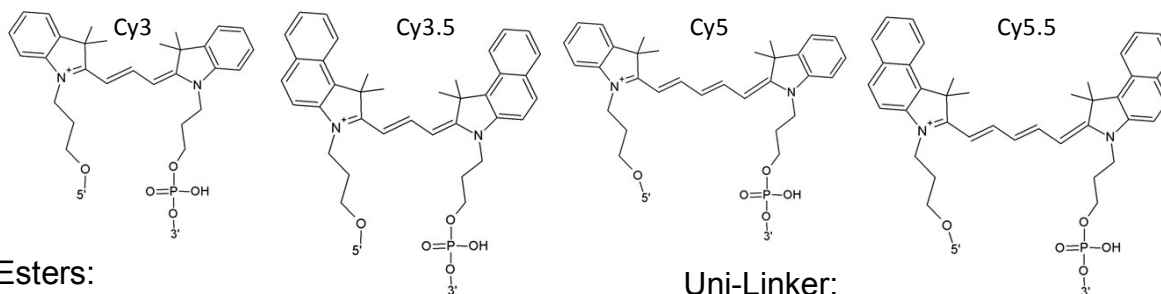

**Esters:**

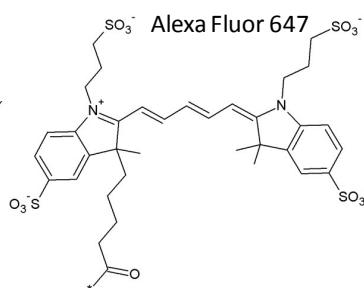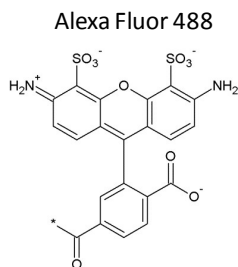

**Uni-Linker:**

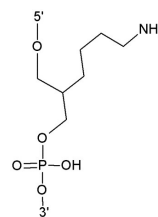

**Figure S1.** Chemical structures of attached dyes

**Optimization of loop and trigger strands**

|       | Trig1 | Trig2 | Trig3 |
|-------|-------|-------|-------|
| Loop1 | --    | 0.21  | 0.34  |
| Loop2 | 0.27  | --    | 0.39  |
| Loop3 | 0.06  | 1.9   | --    |

**Table S1** - Off-target binding probabilities of LoopLink structure, in percent (assuming 500 nM concentration).

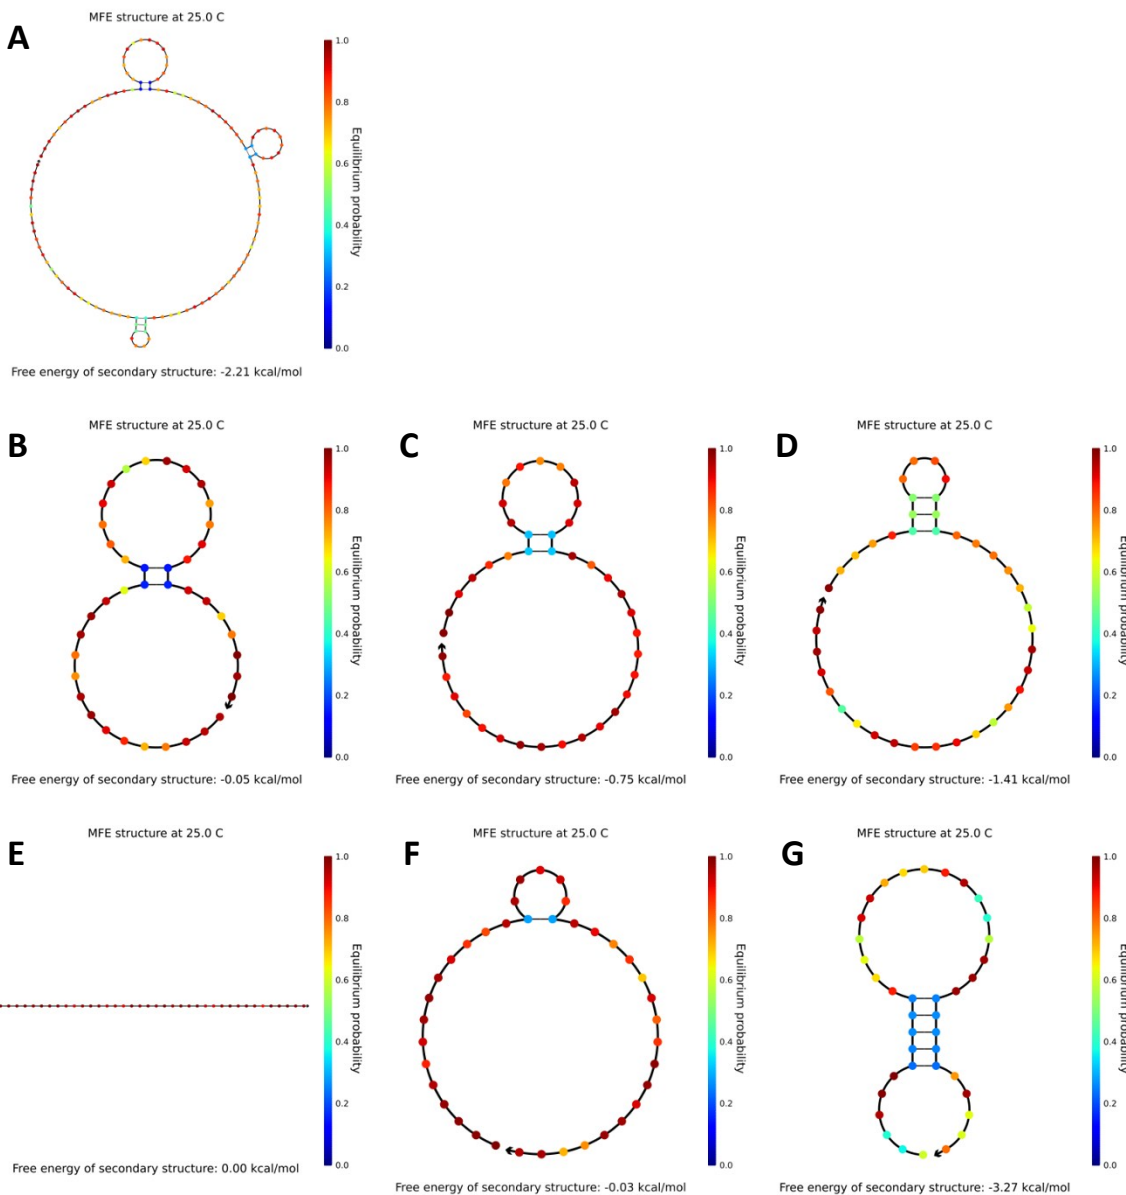

**Figure S2.** Structural optimization of LoopLink structure. Panels show secondary structure of various elements, optimized in NUPACK. (A) All loops as a single strand, best approximating potential intramolecular interactions of the linked strands within the switch structure. Individual strands were also modeled: (B) Loop1 (C) Loop2 (D) Loop3 (E) Trigger 1 (F) Trigger 2 (G) Trigger 3.

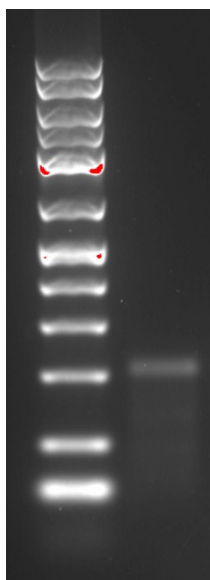

Figure S3. 2% agarose gel of the Dye-in-Loop switch structure. Gel analysis estimated 63% formation efficiency based on overall band intensity.

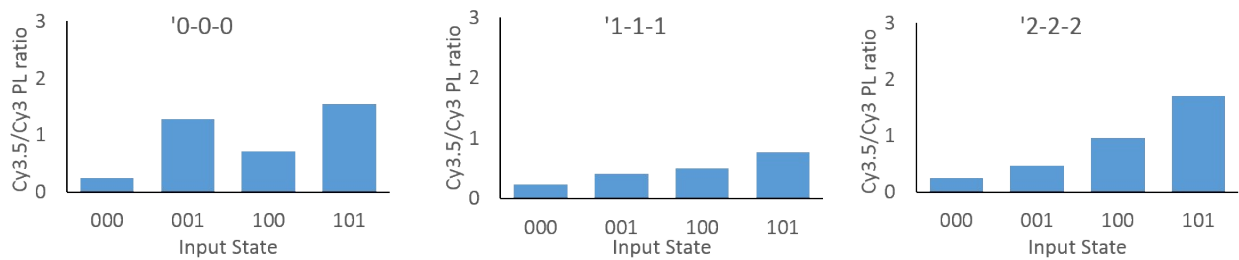

Figure S4. Output ratios for the 0-0-0, 1-1-1 and 2-2-2 spacing used in Figure 4. Thresholds shown in Fig 4F for the 0-0-0 structure is taken from the difference between the 000 and the 100 for the OR gate and between 001 and 101 for the AND gate. For all others the OR gate threshold is between 000 and 001 and the AND gate threshold is between 100 and 101.

**Table S2. DNA Sequences - Removable Linker**

| <b>Name</b>                     | <b>Sequence</b>                                                        | <b>Modification</b>                    | <b>T<sub>m</sub> (1X TAE<br/>12.5 mM MgCl<sub>2</sub>)</b> | <b>Source</b> |
|---------------------------------|------------------------------------------------------------------------|----------------------------------------|------------------------------------------------------------|---------------|
| <b>Arm 1</b>                    | GGTTCAGCCGCAATCCGGCACAGCTATAATAA*GAGTTTGATGA<br>AATGGAGCGGACGTGAGATGG  | Internal Cy3                           | 79.0                                                       | IDT           |
| <b>Arm2</b>                     | GCAAGACTCGTGCTCAGGTCCTAAGTTGGTTCT*ACCGCATGGTA<br>TATGGGGCTTACGGTGGTGCG | Internal Cy3.5 or<br>Unilinker + AF488 | 79.7                                                       | Operon        |
| <b>Arm 3</b>                    | GGATCAGAGCTGGACGGGAGCCTATCGGGTAG*TTATGTTGTTC<br>GCTGGTGTTACTGCATCCAGG  | Internal Cy5 or<br>Unilinker + AF647   | 79.3                                                       | IDT           |
| <b>Cap 1</b>                    | CCATCTCACGTCCGCTGGATTGCGGCTGAACC                                       |                                        | 76.7                                                       | IDT           |
| <b>Cap 2</b>                    | CGCACCACCGTAAGCCTGAGCACGAGTCTTGC                                       |                                        | 76.5                                                       | IDT           |
| <b>Cap 3</b>                    | CCTGGATGCAGTAACACGTCCAGCTCTGATCC                                       |                                        | 73.9                                                       | IDT           |
| <b>Link1<br/>0 base spacing</b> | GCCGGAGACCATATAACCATGCGGTTTATTATAGCTGTGCC                              |                                        | 75.0                                                       | IDT           |
| <b>Link1<br/>1 base spacing</b> | GCCGGAGACCATATAACCATGCGGTATTATTATAGCTGTGCC                             |                                        | 74.6                                                       | IDT           |
| <b>Link1<br/>2 base spacing</b> | GCCGGAGACCATATAACCATGCGGTAATTATTATAGCTGTGCC                            |                                        | 74.7                                                       | IDT           |
| <b>Link1<br/>3 base spacing</b> | GCCGGAGACCATATAACCATGCGGTAAATTATTATAGCTGTGCC                           |                                        | 74.7                                                       | IDT           |
| <b>Link1<br/>6 base spacing</b> | GCCGGAGACCATATAACCATGCGGTAAAAAATTATTATAGCTGTG<br>CC                    |                                        | 75.0                                                       | IDT           |
| <b>Link1<br/>9 base spacing</b> | GCCGGAGACCATATAACCATGCGGTAAAAAAAATTATTATAGCT<br>GTGCC                  |                                        | 75.2                                                       | IDT           |
| <b>Link2<br/>0 base spacing</b> | CCTGTACGCCAGCGAACAACATAAGAACCAACTTAGGACC                               |                                        | 75.1                                                       | IDT           |
| <b>Link2<br/>1 base spacing</b> | CCTGTACGCCAGCGAACAACATAATGAACCAACTTAGGACC                              |                                        | 75.2                                                       | IDT           |

|                                 |                                                      |      |     |
|---------------------------------|------------------------------------------------------|------|-----|
| <b>Link2<br/>2 base spacing</b> | CCTGTACGCCAGCGAACACATAATAGAACCAACTTAGGACC            | 74.8 | IDT |
| <b>Link2<br/>3 base spacing</b> | CCTGTACGCCAGCGAACACATAATAAGAACCAACTTAGGACC           | 74.8 | IDT |
| <b>Link2<br/>6 base spacing</b> | CCTGTACGCCAGCGAACACATAATAATAAGAACCAACTTAGGACC        | 74.6 | IDT |
| <b>Link2<br/>9base spacing</b>  | CCTGTACGCCAGCGAACACATAATAATAATAAGAACCAACTTAGGACC     | 74.5 | IDT |
| <b>Link3<br/>0 base spacing</b> | GATACGGACCATTTTCATCAAACCTCCTACCCGATAGGCTCC           | 74.4 | IDT |
| <b>Link3<br/>1 base spacing</b> | GATACGGACCATTTTCATCAAACCTCACTACCCGATAGGCTCC          | 74.3 | IDT |
| <b>Link3<br/>2 base spacing</b> | GATACGGACCATTTTCATCAAACCTCAAACCTACCCGATAGGCTCC       | 74.4 | IDT |
| <b>Link3<br/>3 base spacing</b> | GATACGGACCATTTTCATCAAACCTCAAACCTACCCGATAGGCTCC       | 74.5 | IDT |
| <b>Link3<br/>6 base spacing</b> | GATACGGACCATTTTCATCAAACCTCAAATAAACTACCCGATAGGCTCC    | 74.4 | IDT |
| <b>Link3<br/>9 base spacing</b> | GATACGGACCATTTTCATCAAACCTCAAATAAAATTCTACCCGATAGGCTCC | 74.4 | IDT |

\*in sequence indicates modifier placement

**Table S3. DNA Sequences - Looped Linker**

| <b>Name</b>       | <b>Sequence</b>                                                                | <b>Modification</b> | <b>T<sub>m</sub> (1X TAE<br/>12.5 mM MgCl<sub>2</sub>)</b> | <b>Source</b> |
|-------------------|--------------------------------------------------------------------------------|---------------------|------------------------------------------------------------|---------------|
| <b>Arm 1</b>      | GGTTCAGCCGCAATCCGGCACAGCTATAATAA*GAGTTTG<br>ATGAAATGGAGCGGACGTGAGATGG          | Internal Cy3        | 79.0                                                       | IDT           |
| <b>Arm2</b>       | GCAAGACTCGTGCTCAGGTCCTAAGTTGGTTCT*ACCGCA<br>TGGTATATGGGGCTTACGGTGGTGCG         | Internal Cy3.5      | 79.7                                                       | Operon        |
| <b>Arm 3</b>      | GGATCAGAGCTGGACGGGAGCCTATCGGGTAG*TTATGTT<br>GTTTCGCTGGTGTACTGCATCCAGG          | Internal Cy5        | 79.3                                                       | IDT           |
| <b>Cap 1</b>      | CCATCTCACGTCCGCTGGATTGCGGCTGAACC                                               |                     | 76.7                                                       | IDT           |
| <b>Cap 2</b>      | CGCACCACCGTAAGCCTGAGCACGAGTCTTGC                                               |                     | 76.5                                                       | IDT           |
| <b>Cap 3</b>      | CCTGGATGCAGTAACACGTCCAGCTCTGATCC                                               |                     | 73.9                                                       | IDT           |
| <b>Loop Link1</b> | CCATATAACCATGCGGTTTAgTTAGAGTGAGACATAAAGC<br>AAAGTTAGTGAGTGAGATTATTATAGCTGTGCC  |                     | 76.9                                                       | IDT           |
| <b>Trigger 1</b>  | TCTCACTCTAACTAATCTCACTCACTAACTCAT<br>CACAA                                     |                     | 70.9                                                       | IDT           |
| <b>Comp 1</b>     | TCACTCACTAACTTTGCTTTATGTCTCACTCTAACT                                           |                     | 70.7                                                       | IDT           |
| <b>Loop Link2</b> | CCAGCGAACAACATAAGTATAGGGTTAAGGGTTCCATTT<br>CAGTTTCATTTCAAGTAAGAACCAACTTAGGACC  |                     | 77.6                                                       | IDT           |
| <b>Trigger 2</b>  | CCCTTAACCCTATACTACTTGAAATGAAACGCCCTTAT                                         |                     | 71.8                                                       | IDT           |
| <b>Comp 2</b>     | CTTGAAATGAAACTGAAATGGAACCCTTAACCCTAT                                           |                     | 70.9                                                       | IDT           |
| <b>Loop Link3</b> | CCATTTTCATCAAACCTCGGATCAGATTTATCTTAGTGTTAG<br>GTGTAGCAGGCATAGTCTACCCGATAGGCTCC |                     | 77.6                                                       | IDT           |
| <b>Trigger 3</b>  | AGATAAATCTGATCCACTATGCCTGCTACAGATACGGA                                         |                     | 72.8                                                       | IDT           |
| <b>Comp 3</b>     | TATGCCTGCTACACCTAACCTAAGATAAATCTGAT                                            |                     | 70.5                                                       | IDT           |

\*in sequence indicates modifier placement

**Table S4. DNA Sequences – Dye-in-Loop**

| <b>Name</b>      | <b>Sequence</b>                                                        | <b>Modification</b> | <b>T<sub>m</sub> (1X TAE<br/>12.5 mM MgCl<sub>2</sub>)</b> | <b>Source</b> |
|------------------|------------------------------------------------------------------------|---------------------|------------------------------------------------------------|---------------|
| <b>Arm 1</b>     | GGTTCAGCCGCAATCCGGCACAGCTATAATAA*GAGTT<br>TGATGAAATGGAGCGGACGTGAGATGG  | Internal Cy3        | 79.0                                                       | IDT           |
| <b>Arm2</b>      | GCAAGACTCGTGCTCAGGTCCTAAGTTGGTTCT*ACCGC<br>ATGGTATATGGGGCTTACGGTGGTGCG | Internal Cy3.5      | 79.7                                                       | Operon        |
| <b>Arm 3</b>     | GGATCAGAGCTGGACGGGAGCCTATCGGGTAG*TTATG<br>TTGTTTCGCTGGTGTACTGCATCCAGG  | Internal Cy5        | 79.3                                                       | IDT           |
| <b>Cap 1</b>     | CCATCTCACGTCCGCTTGAGCACGAGTCTTGC                                       |                     | 75.3                                                       | IDT           |
| <b>Cap 2</b>     | CGCACCACCGTAAGCCCGTCCAGCTCTGATCC                                       |                     | 77.1                                                       | IDT           |
| <b>Cap 3</b>     | CCTGGATGCAGTAACAGGATTGCGGCTGAACC                                       |                     | 74.8                                                       | IDT           |
| <b>Trigger 1</b> | CCATTTTCATCAAACCTCGAACCAACTTAGGACC                                     |                     | 70.5                                                       | IDT           |
| <b>Comp 1</b>    | TTCATCAAACCTCATTATTATAGCTG                                             |                     | 61.4                                                       | IDT           |
| <b>Trigger 2</b> | CCATATAACCATGCGGTCTACCCGATAGGCTCC                                      |                     | 73.2                                                       | IDT           |
| <b>Comp 2</b>    | ATACCATGCGGTAGAACCAACTTAG                                              |                     | 66.8                                                       | IDT           |
| <b>Trigger 3</b> | CCAGCGAACAAACATAATTATTATAGCTGTGCC                                      |                     | 69.7                                                       | IDT           |
| <b>Comp 3</b>    | CGAACAAACATAAACTACCCGATAGG                                             |                     | 65.4                                                       | IDT           |

\*in sequence indicates modifier placement



**Table S5. Fluorophore photophysical and FRET properties.**

| Fluorophores | Quantum yield | Extinction coefficient (M <sup>-1</sup> cm <sup>-1</sup> ) | $\lambda_{\max}$ | $\lambda_{\max}$ | $R_0$ in Å / $J(\lambda)$ in cm <sup>3</sup> M <sup>-1</sup> |                         |                         |                         |                         |
|--------------|---------------|------------------------------------------------------------|------------------|------------------|--------------------------------------------------------------|-------------------------|-------------------------|-------------------------|-------------------------|
|              |               |                                                            | absorption       | emission         | AF488                                                        | Cy3                     | Cy3.5                   | Cy5                     | A647                    |
| <b>AF488</b> | 0.39          | 71,000                                                     | 495 nm           | 519 nm           | 46/1.23e <sup>-13</sup>                                      | 61/6.9e <sup>-13</sup>  | 59/5.93e <sup>-13</sup> | 49/1.9e <sup>-13</sup>  | 47/1.42e <sup>-13</sup> |
| <b>Cy3</b>   | 0.15          | 150,000                                                    | 550 nm           | 570 nm           | ---                                                          | 47/3.68e <sup>-13</sup> | 53/8.01e <sup>-13</sup> | 54/9.37e <sup>-13</sup> | 53/7.83e <sup>-13</sup> |
| <b>Cy3.5</b> | 0.15          | 150,000                                                    | 581 nm           | 596 nm           | ---                                                          | ---                     | 44/2.70e <sup>-13</sup> | 60/1.69e <sup>-12</sup> | 59/1.58e <sup>-12</sup> |
| <b>Cy5</b>   | 0.28          | 250,000                                                    | 649 nm           | 670 nm           | ---                                                          | ---                     | ---                     | 65/1.39e <sup>-12</sup> | ---                     |
| <b>AF647</b> | 0.33          | 190,000                                                    | 675 nm           | 694 nm           | ---                                                          | ---                     | ---                     | ---                     | 65/1.17e <sup>-12</sup> |
